# Supplementary material for: Colloidal rod dynamics under large amplitude oscillatory extensional flow
Source: Royal Society of Chemistry journal article supplement (doi:10.1039/d5sm01122a), 2026-01-01
Supplement: d5sm01122a1.pdf [file d5sm01122a1.pdf]

## Supplementary Material:

### Colloidal Rod Dynamics under Large Amplitude Oscillatory Extensional Flow

Steffen M. Recktenwald<sup>1</sup>, Vincenzo Calabrese<sup>1,2</sup>, Amy Q. Shen<sup>1</sup>, Giovanniantonio Natale<sup>3</sup>, and Simon J. Haward<sup>1\*</sup>

<sup>1</sup>Micro/Bio/Nanofluidics Unit, Okinawa Institute of Science and Technology Graduate University, 1919-1 Tancha, Onna-son, Okinawa 904-0495, Japan

<sup>2</sup>Current Address: POLYMAT, Rheology and Advanced Manufacturing group, University of the Basque Country UPV/EHU, Avenida Tolosa 72, Donostia-San Sebastian 20018, Spain

<sup>3</sup>Department of Chemical and Petroleum Engineering, Schulich School of Engineering, University of Calgary, 2500 University Drive NW, Calgary, Alberta T2N 1N4, Canada

**E-mail:** [simon.haward@oist.jp](mailto:simon.haward@oist.jp);

# 1 Residual Birefringence

Fig. S1 displays the residual birefringence  $\langle \Delta n \rangle_{\text{res}}$  as a function of  $Pe_0$  for different pulsation periods ( $1 \leq T \leq 50$  s) and various CNC concentrations. As the period decreases, *i.e.*, as the pulsation frequency increases, the onset of detectable residual birefringence  $\langle \Delta n \rangle_{\text{res}}$  shifts to lower  $Pe_0$  values.

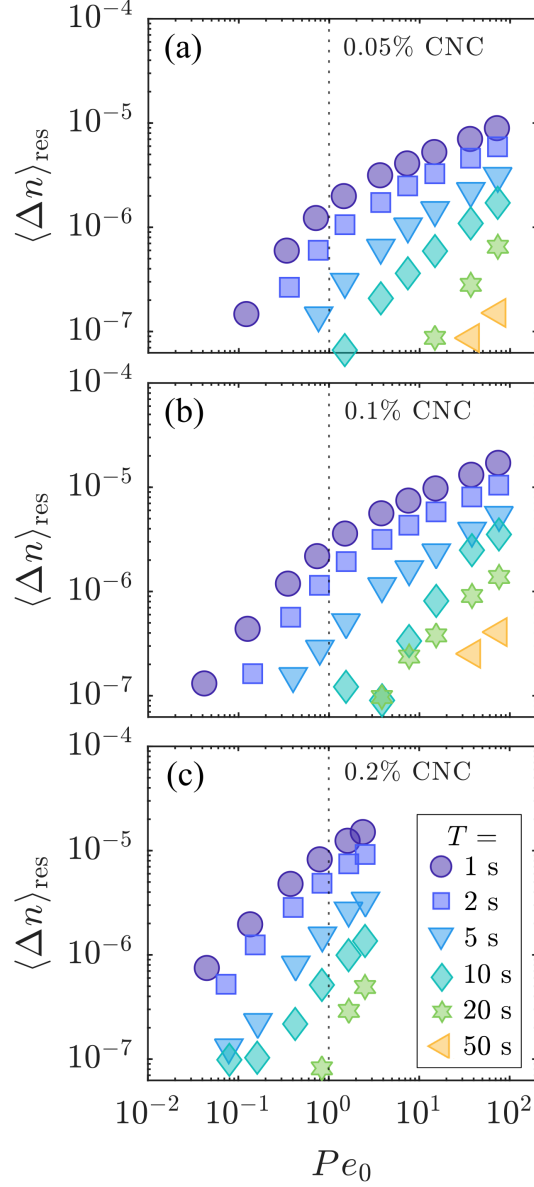

**Fig. S 1:** Residual birefringence  $\langle \Delta n \rangle_{\text{res}}$  during pulsatile LAOE. Data is shown as a function of  $Pe_0$  for the three samples (a-c) and various periods  $T$ .

## 2 Lissajous Plots

Fig. S2 displays the experimental Lissajous plots for a 0.1 % CNC sample over a broad range of  $T$  and  $\dot{\epsilon}_{0,\text{set}}$ . We can highlight the following general trends.

At relatively high  $T$  (*e.g.*,  $T = 50$  s), there is a lack of hysteretic behavior as well as residual birefringence, indicating that the CNCs are in a flow-independent regime. However, at  $\dot{\epsilon}_{0,\text{set}} \gtrsim 2 \text{ s}^{-1}$ , the birefringence becomes progressively non-linear.

As  $T$  decreases and approaches values comparable to  $1/\overline{D}_r$ , evidence of flow-history dependence in the CNCs emerges, manifested as hysteresis. At even smaller  $T$ , residual birefringence also appears (*e.g.*, see  $\dot{\epsilon}_{0,\text{set}} = 5 \text{ s}^{-1}$  as  $T$  decreases). It appears that hysteresis provides a more sensitive measure for detecting the onset of flow-history dependence than residual birefringence. This is likely because the residual birefringence is limited by the detection threshold of the experimental setup.

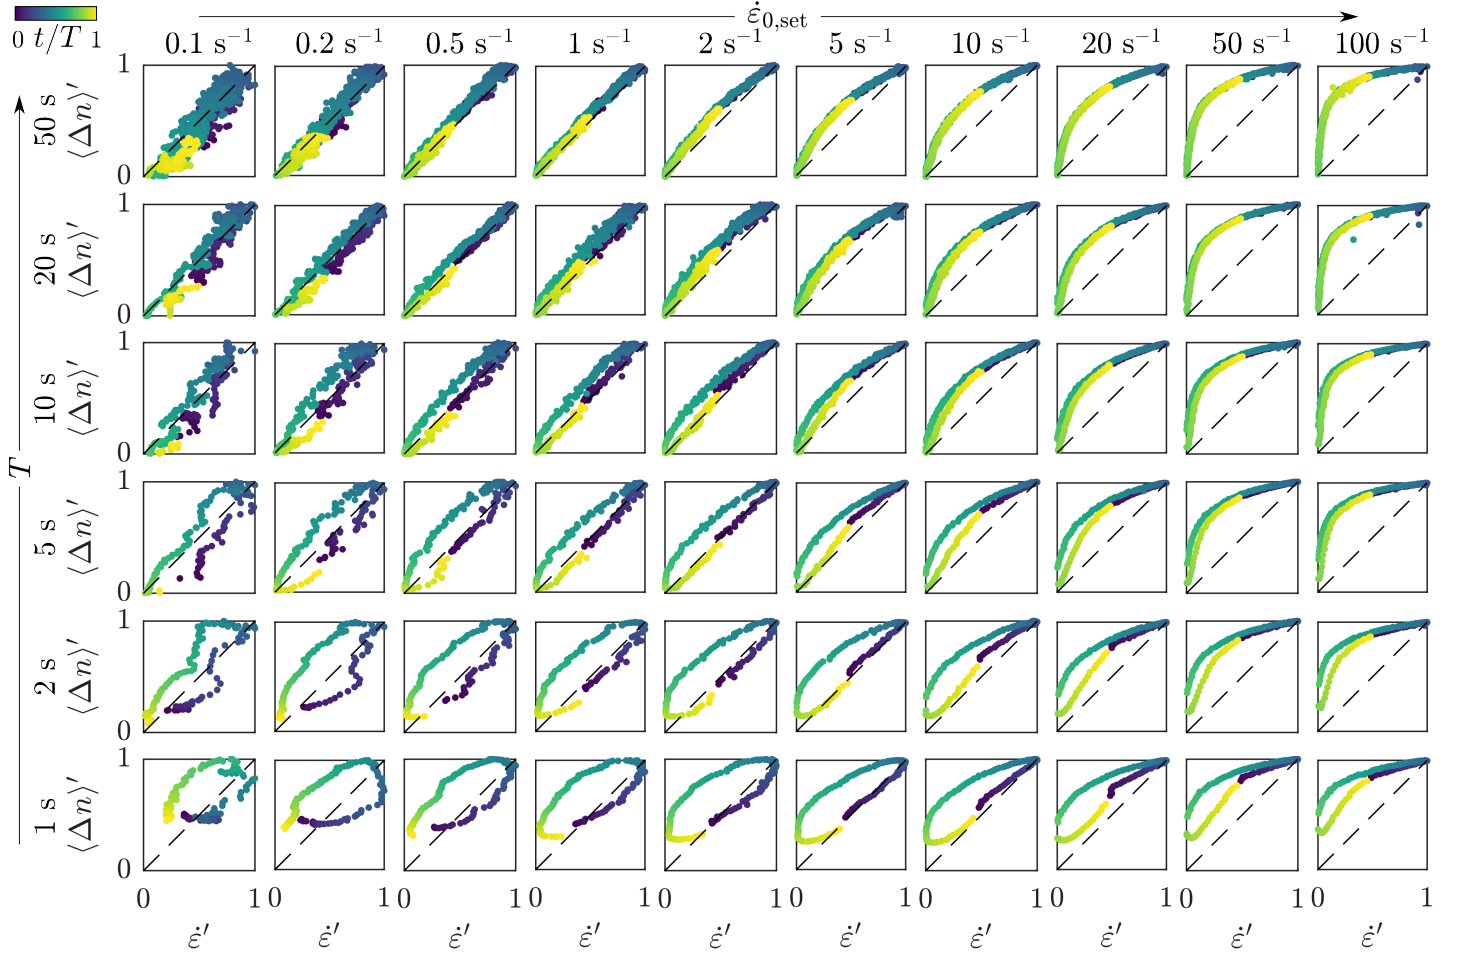

**Fig. S 2:** Experimental Lissajous curves of the normalized average birefringence  $\langle \Delta n \rangle' = \langle \Delta n \rangle(t) / \langle \Delta n \rangle_{\text{max}}$  as a function of the normalized extension rate  $\dot{\epsilon}' = \dot{\epsilon}(t) / \dot{\epsilon}_{\text{max}}$  for various  $T$  and  $\dot{\epsilon}_{0,\text{set}}$ . Data is shown for the 0.1 % CNC sample. Black dashed lines correspond to slopes of 1.
